# Supplementary material
Source: Royal Society of Chemistry journal article supplement (doi:10.1039/d6cp01530a)
Supplement: d6cp01530a1.pdf [file d6cp01530a1.pdf]

# Relativistic DFT-NMR of $^{19}\text{F}$ in Tantalum(V) and Niobium(V) Fluorohalides

*Giacomo Saielli*<sup>a,b\*</sup>

<sup>a</sup>CNR – ITM Institute on Membrane Technology “Enrico Drioli”, Padova Unit, Via Marzolo, 1, 35131 Padova, Italy

<sup>b</sup>Department of Chemical Sciences, University of Padova, Via Marzolo 1, 35131 Padova, Italy

## Electronic Supporting Information (ESI)

|                                                                                                         |         |
|---------------------------------------------------------------------------------------------------------|---------|
| <b>Figures S1 – S21.</b> Correlation graphs at the various levels of theory for the Tantalum complexes. | p. 2-12 |
| <b>Figure S22.</b> Correlation graph for the Niobium complexes at level of theory <b>xiv</b> ).         | p. 12.  |
| <b>Table S1.</b> Statistical parameters.                                                                | p. 13   |
| <b>Table S2.</b> Spinorbit corrections.                                                                 | p. 14   |

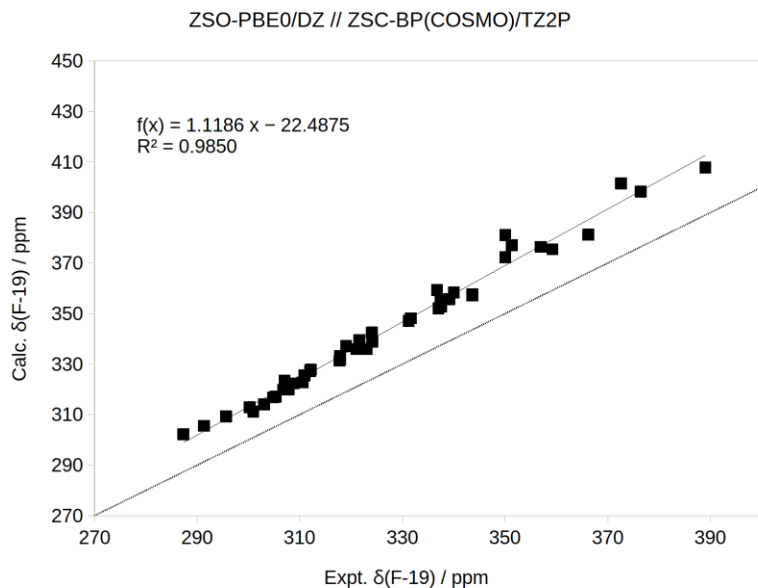

**Figure S1.** Correlation between calculated and experimental  $^{19}\text{F}$  chemical shifts (w.r.t.  $\text{F}_2$ ) for Tantalum(V) fluorohalides at level of theory **i**). Thick dotted line:  $y = x$ ; thin black line: linear fit.

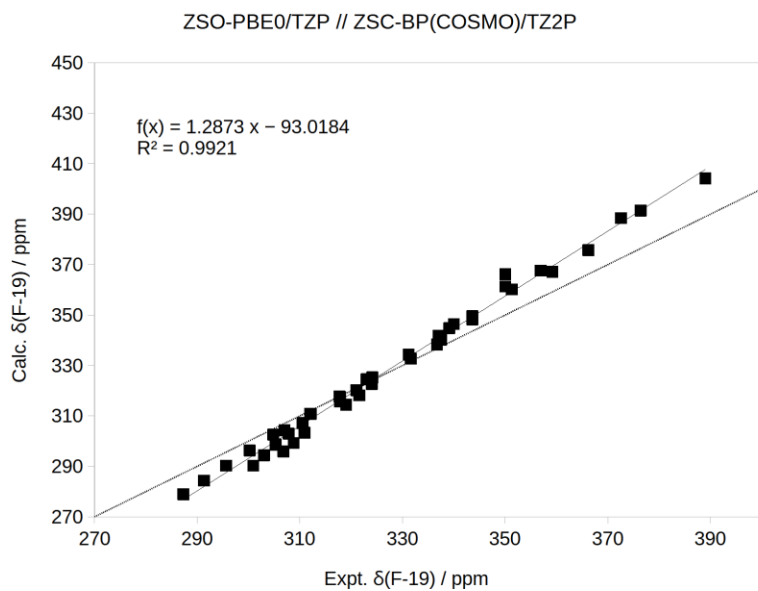

**Figure S2.** Correlation between calculated and experimental  $^{19}\text{F}$  chemical shifts (w.r.t.  $\text{F}_2$ ) for Tantalum(V) fluorohalides at level of theory **ii**). Thick dotted line:  $y = x$ ; thin black line: linear fit.

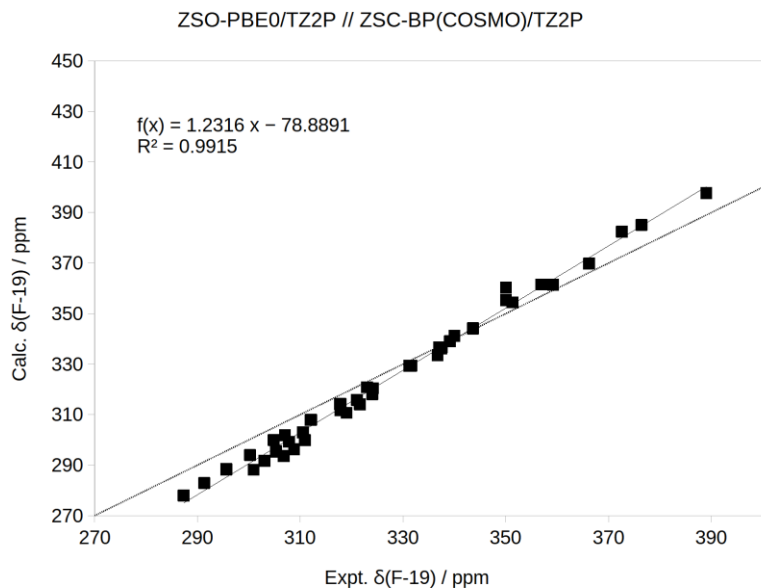

**Figure S3.** Correlation between calculated and experimental  $^{19}\text{F}$  chemical shifts (w.r.t.  $\text{F}_2$ ) for Tantalum(V) fluorohalides at level of theory **iii**). Thick dotted line:  $y = x$ ; thin black line: linear fit.

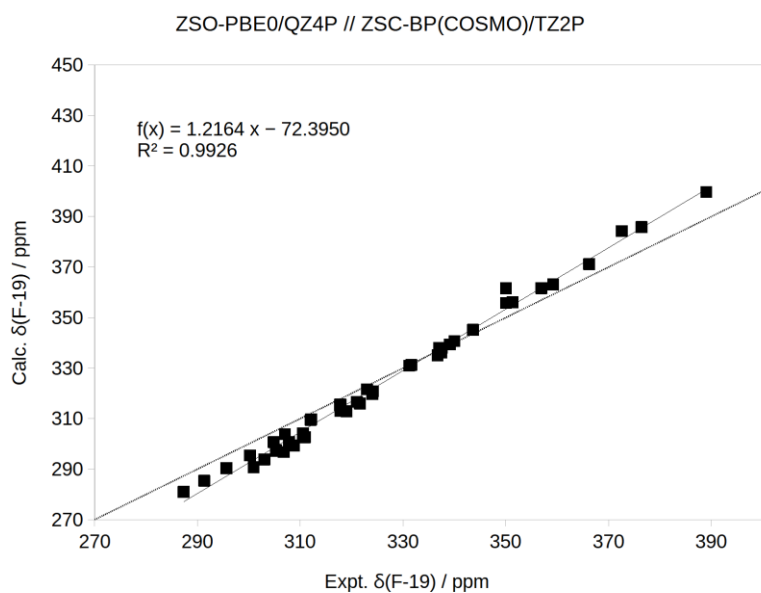

**Figure S4.** Correlation between calculated and experimental  $^{19}\text{F}$  chemical shifts (w.r.t.  $\text{F}_2$ ) for Tantalum(V) fluorohalides at level of theory **iv**). Thick dotted line:  $y = x$ ; thin black line: linear fit.

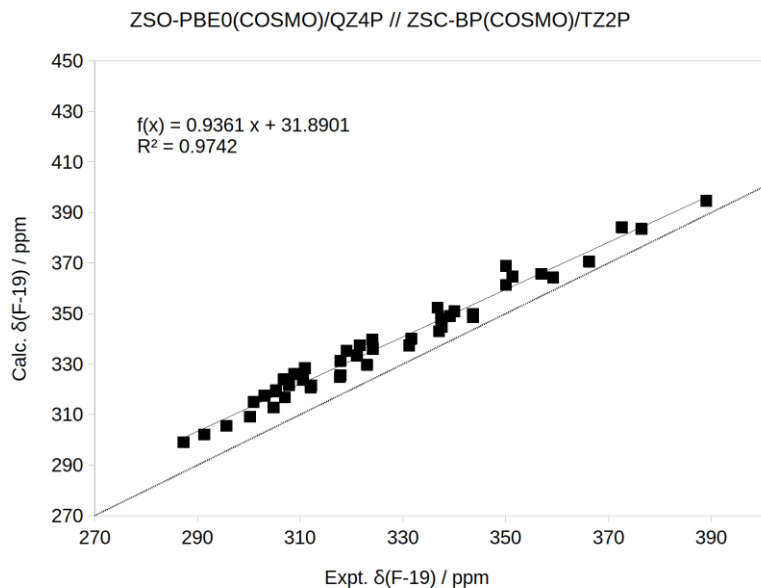

**Figure S5.** Correlation between calculated and experimental  $^{19}\text{F}$  chemical shifts (w.r.t.  $\text{F}_2$ ) for Tantalum(V) fluorohalides at level of theory v. Thick dotted line:  $y = x$ ; thin black line: linear fit.

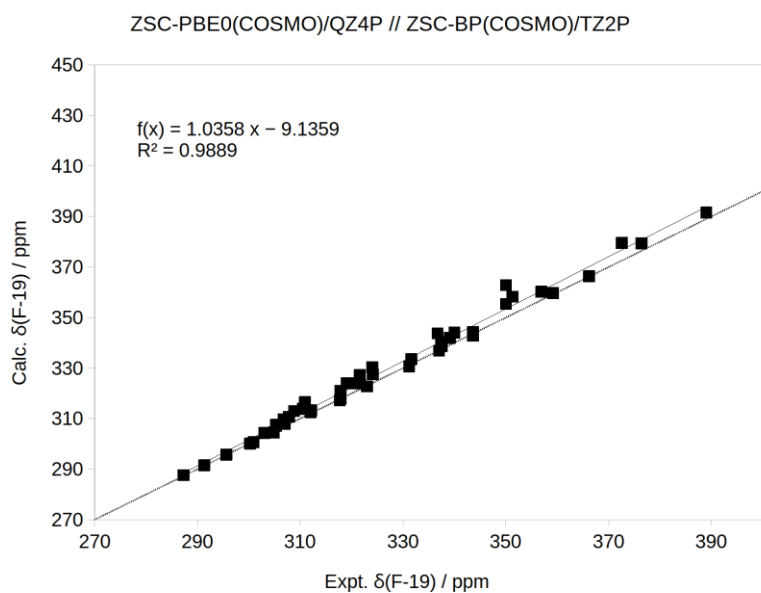

**Figure S6.** Correlation between calculated and experimental  $^{19}\text{F}$  chemical shifts (w.r.t.  $\text{F}_2$ ) for Tantalum(V) fluorohalides at level of theory vi). Thick dotted line:  $y = x$ ; thin black line: linear fit.

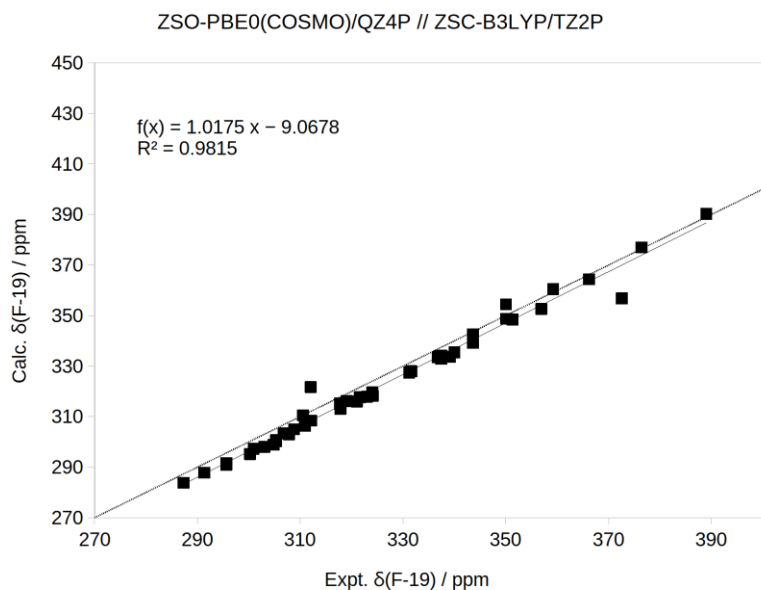

**Figure S7.** Correlation between calculated and experimental  $^{19}\text{F}$  chemical shifts (w.r.t.  $\text{F}_2$ ) for Tantalum(V) fluorohalides at level of theory **vii**). Thick dotted line:  $y = x$ ; thin black line: linear fit.

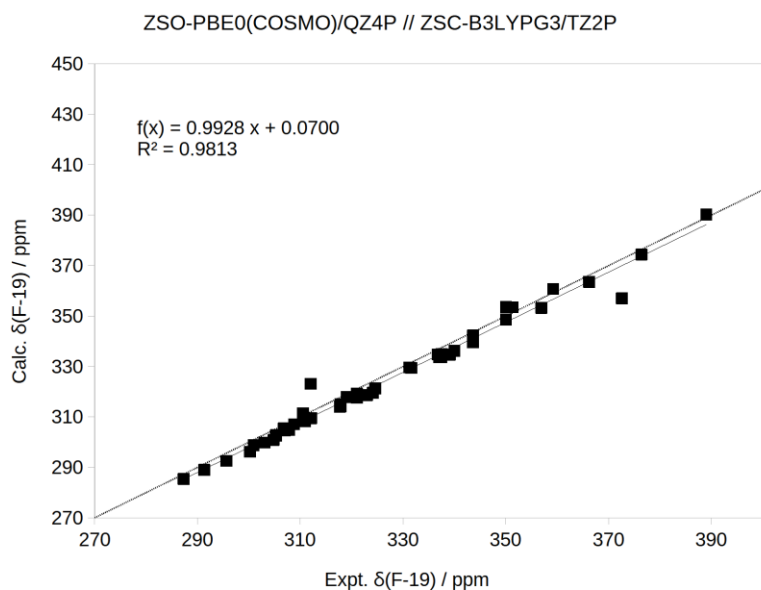

**Figure S8.** Correlation between calculated and experimental  $^{19}\text{F}$  chemical shifts (w.r.t.  $\text{F}_2$ ) for Tantalum(V) fluorohalides at level of theory **viii**). Thick dotted line:  $y = x$ ; thin black line: linear fit.

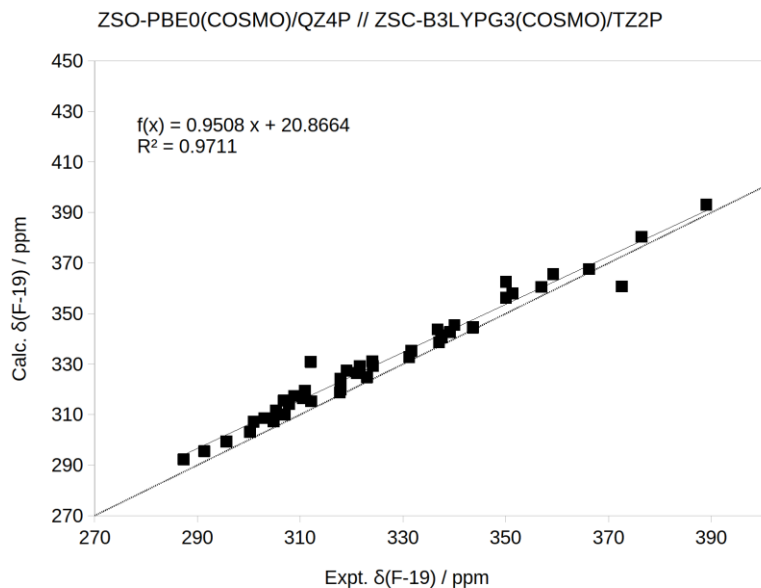

**Figure S9.** Correlation between calculated and experimental  $^{19}\text{F}$  chemical shifts (w.r.t.  $\text{F}_2$ ) for Tantalum(V) fluorohalides at level of theory **xi**). Thick dotted line:  $y = x$ ; thin black line: linear fit.

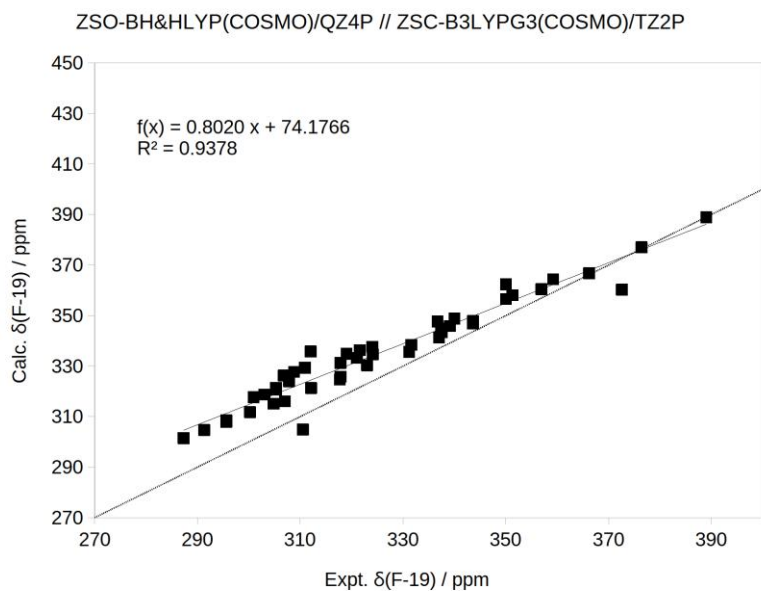

**Figure S10.** Correlation between calculated and experimental  $^{19}\text{F}$  chemical shifts (w.r.t.  $\text{F}_2$ ) for Tantalum(V) fluorohalides at level of theory **x**). Thick dotted line:  $y = x$ ; thin black line: linear fit.

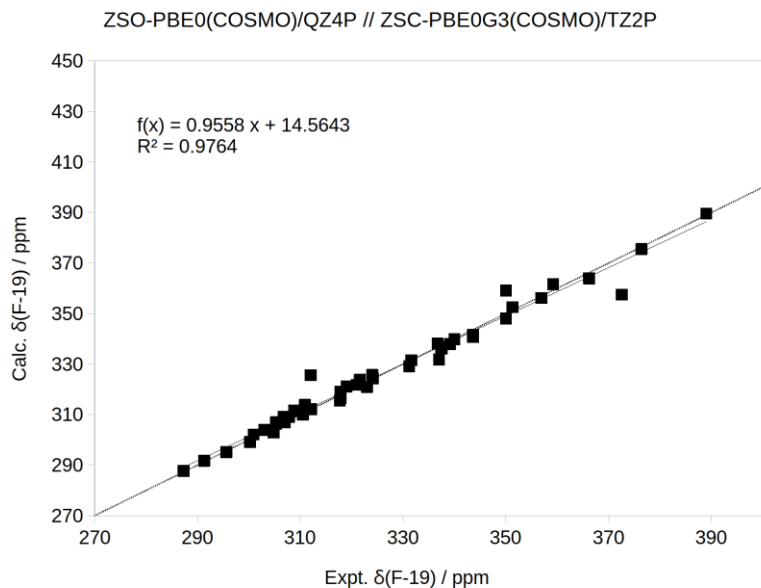

**Figure S11.** Correlation between calculated and experimental  $^{19}\text{F}$  chemical shifts (w.r.t.  $\text{F}_2$ ) for Tantalum(V) fluorohalides at level of theory **xi**). Thick dotted line:  $y = x$ ; thin black line: linear fit.

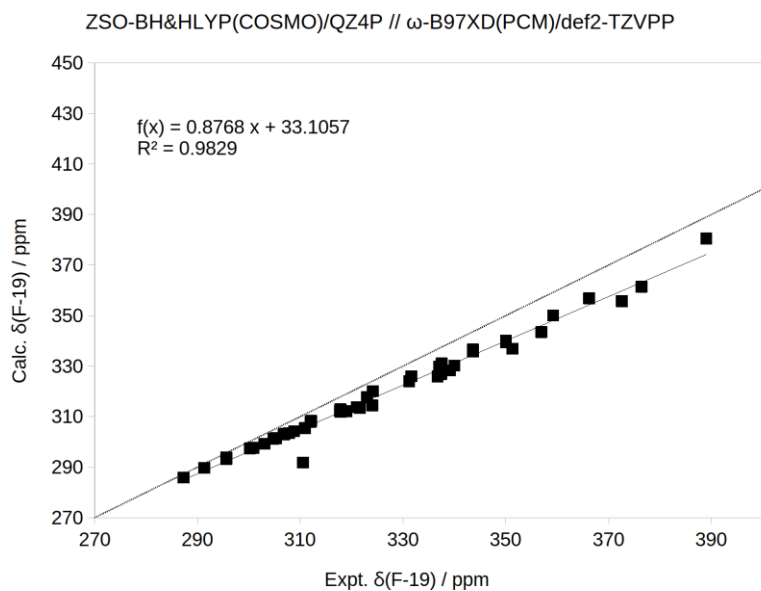

**Figure S12.** Correlation between calculated and experimental  $^{19}\text{F}$  chemical shifts (w.r.t.  $\text{F}_2$ ) for Tantalum(V) fluorohalides at level of theory **xii**). Thick dotted line:  $y = x$ ; thin black line: linear fit.

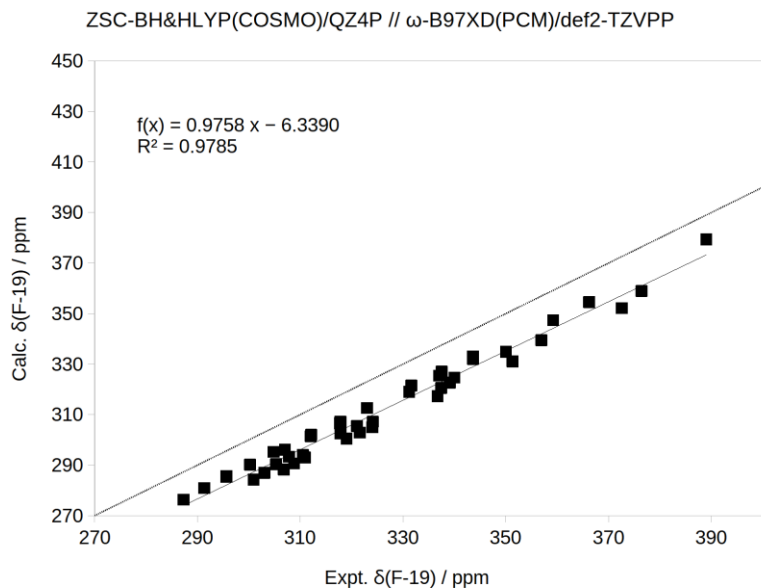

**Figure S13.** Correlation between calculated and experimental  $^{19}\text{F}$  chemical shifts (w.r.t.  $\text{F}_2$ ) for Tantalum(V) fluorohalides at level of theory **xiii**). Thick dotted line:  $y = x$ ; thin black line: linear fit.

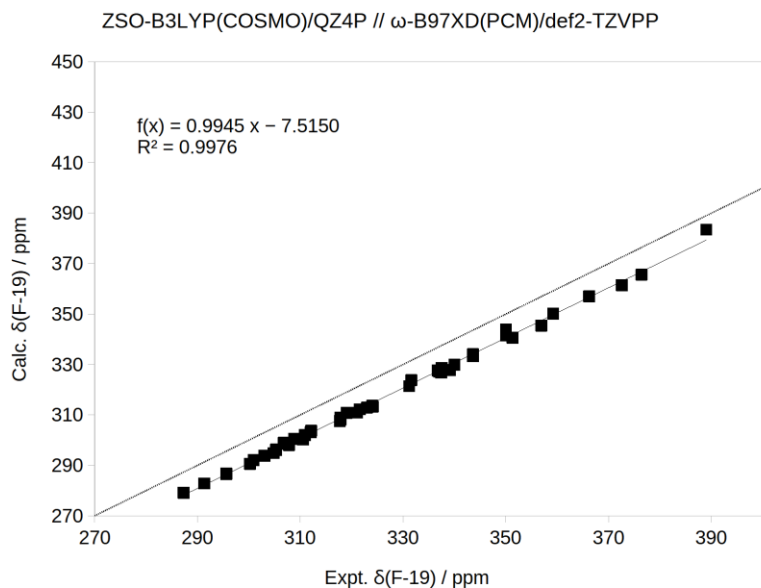

**Figure S14.** Correlation between calculated and experimental  $^{19}\text{F}$  chemical shifts (w.r.t.  $\text{F}_2$ ) for Tantalum(V) fluorohalides at level of theory **xiv**). Thick dotted line:  $y = x$ ; thin black line: linear fit.

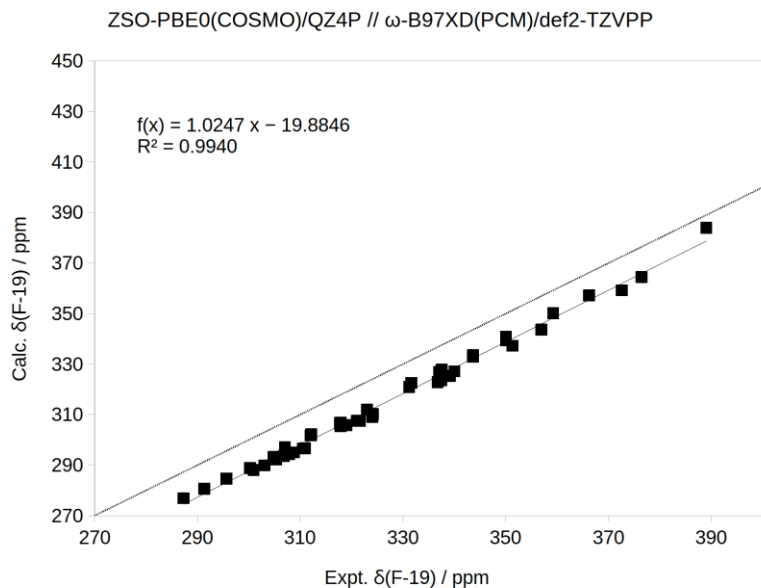

**Figure S15.** Correlation between calculated and experimental  $^{19}\text{F}$  chemical shifts (w.r.t.  $\text{F}_2$ ) for Tantalum(V) fluorohalides at level of theory **xv**). Thick dotted line:  $y = x$ ; thin black line: linear fit.

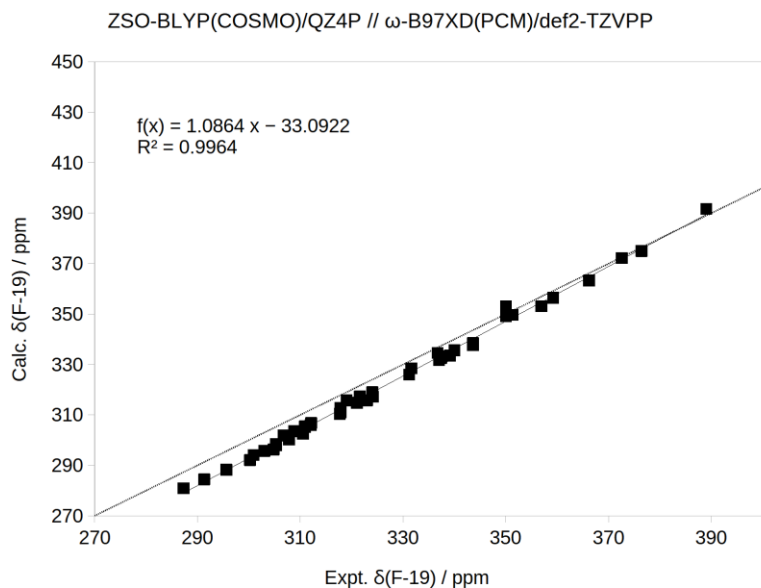

**Figure S16.** Correlation between calculated and experimental  $^{19}\text{F}$  chemical shifts (w.r.t.  $\text{F}_2$ ) for Tantalum(V) fluorohalides at level of theory **xvi**). Thick dotted line:  $y = x$ ; thin black line: linear fit.

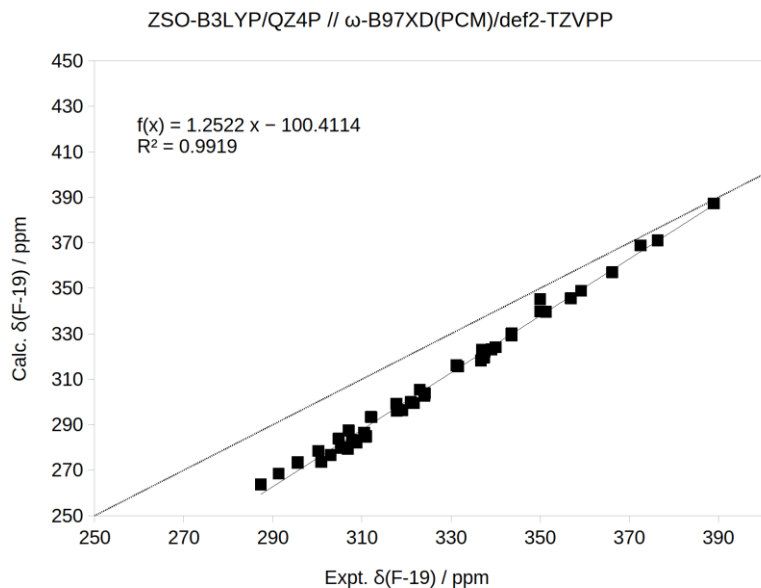

**Figure S17.** Correlation between calculated and experimental  $^{19}\text{F}$  chemical shifts (w.r.t.  $\text{F}_2$ ) for Tantalum(V) fluorohalides at level of theory **xvii**). Thick dotted line:  $y = x$ ; thin black line: linear fit.

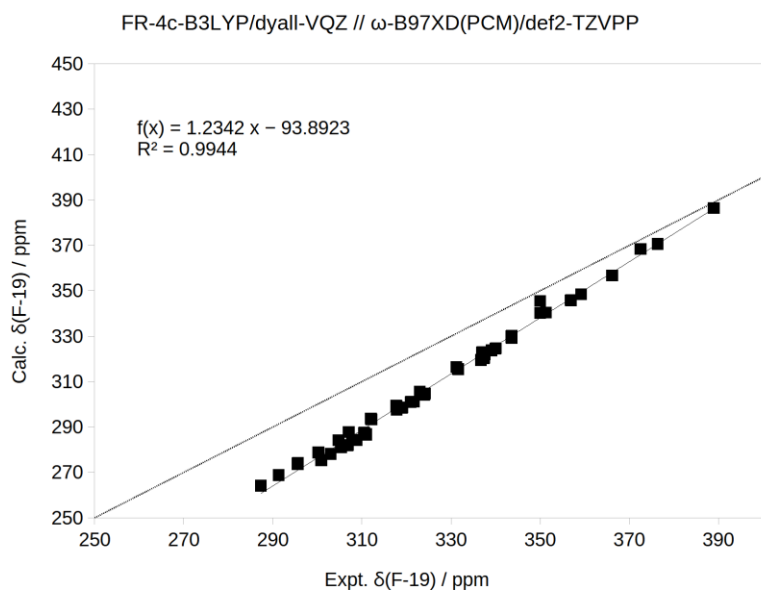

**Figure S18.** Correlation between calculated and experimental  $^{19}\text{F}$  chemical shifts (w.r.t.  $\text{F}_2$ ) for Tantalum(V) fluorohalides at level of theory **xviii**). Thick dotted line:  $y = x$ ; thin black line: linear fit.

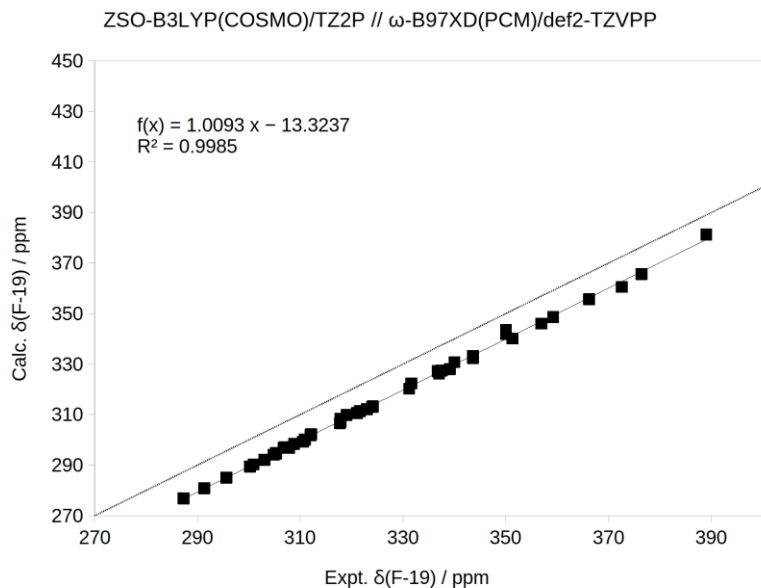

**Figure S19.** Correlation between calculated and experimental  $^{19}\text{F}$  chemical shifts (w.r.t.  $\text{F}_2$ ) for Tantalum(V) fluorohalides at level of theory **xix**). Thick dotted line:  $y = x$ ; thin black line: linear fit.

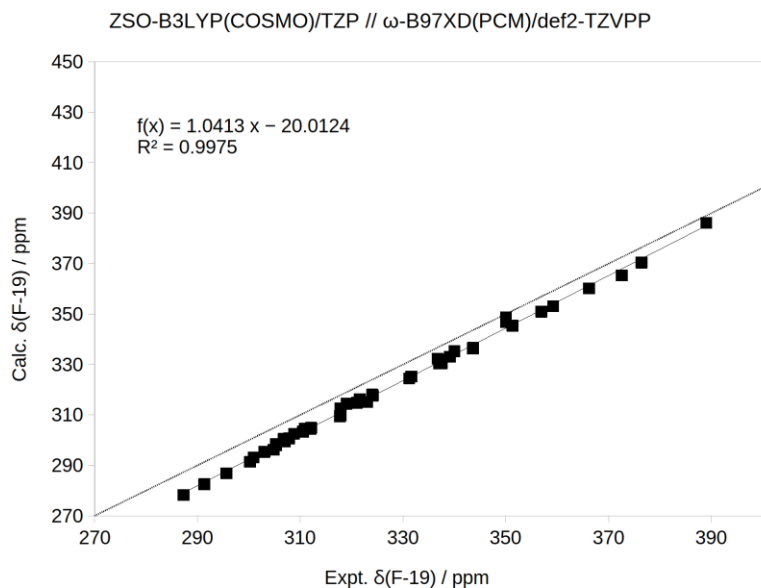

**Figure S20.** Correlation between calculated and experimental  $^{19}\text{F}$  chemical shifts (w.r.t.  $\text{F}_2$ ) for Tantalum(V) fluorohalides at level of theory **xx**). Thick dotted line:  $y = x$ ; thin black line: linear fit.

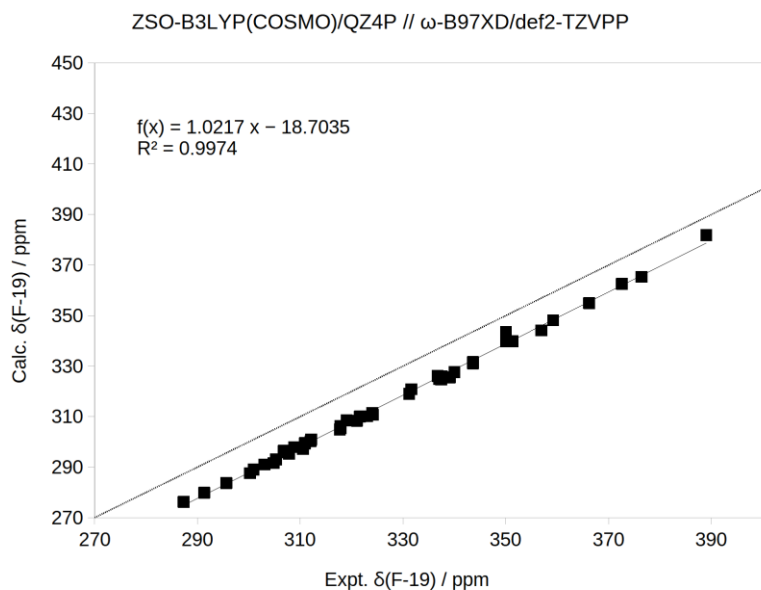

**Figure S21.** Correlation between calculated and experimental  $^{19}\text{F}$  chemical shifts (w.r.t.  $\text{F}_2$ ) for Tantalum(V) fluorohalides at level of theory **xxi**). Thick dotted line:  $y = x$ ; thin black line: linear fit.

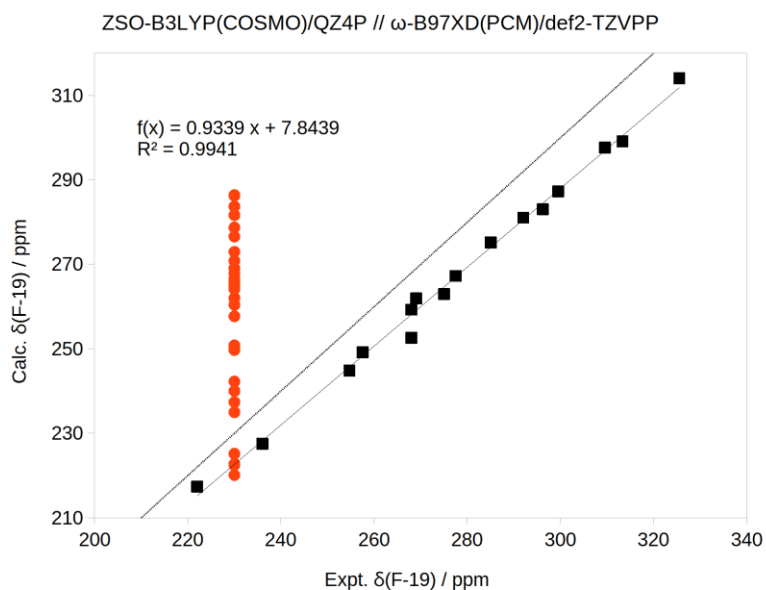

**Figure S22.** Correlation between calculated and experimental  $^{19}\text{F}$  chemical shifts (w.r.t.  $\text{F}_2$ ) for Niobium(V) fluorohalides at level of theory **ii**). Thick dotted line:  $y = x$ ; thin black line: linear fit.

Red points: calculated values for the remaining Nb complexes not experimentally reported by Buslaev and Ylyin and correlated with the of 230 ppm assigned to *cis*-NbF<sub>4</sub>Br<sub>2</sub><sup>-</sup> (IV).

**Table S1:** Statistical parameters of the calculated vs. experimental chemical shifts of the Tantalum(V) fluorhalides at the various levels of theory.

| Level of theory | R <sup>2</sup> | Slope  | Intercept / ppm | MAE / ppm | MaxErr / ppm |
|-----------------|----------------|--------|-----------------|-----------|--------------|
| <b>i)</b>       | 0.9850         | 1.1186 | -22.4           | 16.1      | 31.1         |
| <b>ii)</b>      | 0.9921         | 1.2873 | -93.0           | 5.9       | 16.1         |
| <b>iii)</b>     | 0.9915         | 1.2316 | -78.9           | 5.9       | 13.2         |
| <b>iv)</b>      | 0.9926         | 1.2164 | -72.39499       | 5.0       | 11.7         |
| <b>v)</b>       | 0.9742         | 0.9361 | 31.9            | 11.1      | 18.8         |
| <b>vi)</b>      | 0.9889         | 1.0358 | -9.1            | 2.7       | 12.8         |
| <b>vii)</b>     | 0.9815         | 1.0175 | -9.1            | 4.1       | 15.8         |
| <b>viii)</b>    | 0.9812         | 0.9928 | 0.1             | 3.2       | 15.6         |
| <b>ix)</b>      | 0.9711         | 0.9508 | 20.9            | 5.4       | 18.9         |
| <b>x)</b>       | 0.9378         | 0.8020 | 74.2            | 10.4      | 23.8         |
| <b>xi)</b>      | 0.9764         | 0.9558 | 14.6            | 2.1       | 15.1         |
| <b>xii)</b>     | 0.9829         | 0.8768 | 33.1            | 7.0       | 18.7         |
| <b>xiii)</b>    | 0.9785         | 0.9758 | -6.3            | 14.2      | 20.4         |
| <b>xiv)</b>     | 0.9976         | 0.9945 | -7.5            | 9.3       | 11.5         |

|        |        |        |        |      |      |
|--------|--------|--------|--------|------|------|
| xv)    | 0.9940 | 1.0247 | -19.9  | 11.8 | 14.9 |
| xvi)   | 0.9964 | 1.0864 | -33.1  | 5.2  | 8.5  |
| xvii)  | 0.9919 | 1.2522 | -100.4 | 18.2 | 27.5 |
| xviii) | 0.9944 | 1.2342 | -93.9  | 17.6 | 25.6 |
| xix)   | 0.9985 | 1.0093 | -13.3  | 10.3 | 12.1 |
| xx)    | 0.9975 | 1.0413 | -20.0  | 6.6  | 9.0  |
| xxi)   | 0.9974 | 1.0217 | -18.7  | 11.6 | 13.6 |

**Table S2:** SO correction (obtained as the difference between the shielding constant at the ZORA-SO- and ZORA-SC-B3LYP(COSMO)/QZ4P levels for the compounds reported in Figure 5 of the main text.

| mol |    | Ta complexes                                           | Nb complexes                                           |
|-----|----|--------------------------------------------------------|--------------------------------------------------------|
|     |    | $\sigma_{\text{SO}} - \sigma_{\text{SC}} / \text{ppm}$ | $\sigma_{\text{SO}} - \sigma_{\text{SC}} / \text{ppm}$ |
| I   | F1 | 7.3                                                    | 5.4                                                    |
| II  | F1 | 8.6                                                    | 5.8                                                    |
| II  | F2 | 9.1                                                    | 5.5                                                    |
| III | F1 | 10.3                                                   | 7.1                                                    |
| IV  | F1 | 10.7                                                   | 6.9                                                    |
| IV  | F2 | 10.6                                                   | 6.0                                                    |
| VI  | F1 | 14.8                                                   | 10.3                                                   |

|         |    |      |     |
|---------|----|------|-----|
| XXXII   | F1 | 8.4  | 5.6 |
| XXXII   | F2 | 8.4  | 5.4 |
| XXXIII  | F1 | 9.5  | 5.9 |
| XXXIV   | F1 | 9.9  | 6.0 |
| XXXIV   | F2 | 9.7  | 5.8 |
| XXXV    | F1 | 11.0 | 6.5 |
| XXXV    | F2 | 10.9 | 6.2 |
| XXXVI   | F1 | 12.3 | 7.1 |
| XXXVII  | F2 | 12.6 | 6.9 |
| XXXVIII | F2 | 14.0 | 7.6 |
